# Supplementary material for: Reliability of human retina organoid generation from hiPSC-derived neuroepithelial cysts
Source: Front Cell Neurosci. 2023 Oct 6;17:1166641. doi: 10.3389/fncel.2023.1166641 (PMC10587494; doi:10.3389/fncel.2023.1166641)
Supplement: Supplementary file 3 [file Table_3.XLSX]

## Sheet: Fig 1
	Related to Fig.1D: reduced data
		HRO YIELD per hiPSC well
		5A	CRTD1	CRTD2	CRTD3	ND5	GBE	IMR90
	mean	13.1778	8.79842	6.8608	1.59375	1.11647	4.43056	4.88857
	SD	11.553	5.86897	1.84017	1.09628	0.947581	4.69685	2.53494
	N	5	8	4	4	3	3	4
					HRO YIELD per hiPSC well (per experiment)
		5A	CRTD1	CRTD2	CRTD3	ND5	GBE	IMR90
		18.3333	17.5	6.81818	0	0.583333	3.75	3
		30	7.29167	9.375	2	2.21053	9.43056	4.11111
		11.2222	15	6.25	2.5	0.555556	0.111111	8.625
		6.33333	10	5	1.875			3.81818
		0	9.83333
			8.79012
			0.777778
			1.19444

## Sheet: Fig 2
	Related to Fig. 2C: reduced data and statistical analysis (Students t-test)
		PROTOCOL COMPARISON
		HRO YIELD / hiPSC well
	experiment	hIPSC line	AGG	CYST
	1	5A	9.41	18.33
	2	5A	2.38	30
	3	CRTD1	0	17.5
	4	CRTD1	0	7.29
	5	CRTD1	0	15
	6	CRTD1	0	12.14
	7	CRTD2	0	6.82
	8	CRTD2	0	9.38
	9	CRTD2	0	6.25
	10	CRTD2	2	5
	11	CRTD3	3	0
	12	CRTD3	0	2
	13	CRTD3	4.5	2.5
	14	CRTD3	0.5	1.88
		Total	21.79	134.09
		mean	1.55643	9.57786
		standard deviation	2.68612	8.30112
		statistical analysis
		unpaired Students t-test
		p value	0.0020

## Sheet: Fig 3
		Related to Fig.3C: reduced data and unpaired t-test statistical analysis
			ARR3 cells / DAPI [%]		NRL cells / DAPI [%]		SOX9 cells / DAPI [%]
			CYST	AGG	CYST	AGG	CYST	AGG
		mean	25.02	15.27	20.53	21.65	25.68	27.68
		SD	5.18	4.21	6.27	5.64	2.48	4.11
		N	2	2	2	2	2	2
		n	10	7	10	7	10	7
		p value	<0.0001		0.5972		0.0863
		Related to Fig.3D: reduced data and unpaired t-test statistical analysis
		PIS / 100 [µm]	CYST	mean ±SD	21.1 ±2.3
				N	2
				n	12
			AGG	mean ±SD	10.9 ±3.0
				N	2
				n	7
			p value		<0.0001
		Related to Fig.3G: reduced data and unpaired t-test statistical analysis
		Reactive gliosis (GFAP+ IHC area / DAPI+ IHC area)	CYST	mean ±SD	1.4 ±3.3
				N	4
				n	46
			AGG	mean ±SD	66.7 ±38.3
				N	4
				n	27
			p value		<0.0001

## Sheet: Fig 4 + Suppl Fig 6
	Related to Fig. 4C, E and Suppl. Fig. 6D: reduced data and statistical analysis
			CRX+ cells / DAPI [%]
			D30	D60	D90	D120	D200				1-ANOVA statistical analysis (Tukey post hoc test)
	5A	mean ±SD	3.3 ±5.4	20.3 ±6.1	31.3 ±6.7	33.2 ±4.6	56.2 ±8.0				5A	D30	D60	D90	D120		GBE	D30	D60	D90	D120
		N	3	3	3	1	3				D60	<0.0001					D60	0.0157
		n	11	24	27	11	24				D90	<0.0001	<0.0001				D90	<0.0001	0.357
											D120	<0.0001	<0.0001	0.9329			D120	<0.0001	<0.0001	<0.0001
	CRTD1	mean ±SD	-	-	-	35.2 ±9.4	61.5 ±10.0				D200	<0.0001	<0.0001	<0.0001	<0.0001		D200	<0.0001	<0.0001	<0.0001	0.2924
		N	-	-	-	4	3
		n	-	-	-	23	28				2-ANOVA statistical analysis (Tukey post hoc test)
											D120	5A	ND5	GBE	IMR90		D200	CRTD1	CRTD2	CRTD3	ND5	GBE	IMR90		D120 vs D200	CRTD1	5A	ND5	GBE	IMR90
	CRTD2	mean ±SD	-	-	-	-	37.42 ±6.931				CRTD1	>0.9999	<0.0001	0.6288	0.9738		5A	0.5556	<0.0001	<0.0001	0.1506	0.1432	<0.0001		CRTD1	<0.0001
		N	-	-	-	-	3				5A		0.0006	0.5177	>0.9999		CRTD1		<0.0001	<0.0001	0.0019	<0.0001	<0.0001		5A		<0.0001
		n	-	-	-	-	15				ND5			<0.0001	0.0028		CRTD2			0.9968	0.3521	0.0563	0.9615		ND5			<0.0001
											GBE				0.1537		CRTD3				0.1971	0.0338	>0.9999		GBE				0.7782
	CRTD3	mean ±SD	-	-	-	-	34.75 ±6.532										ND5					0.9995	0.0284		IMR90					0.3721
		N	-	-	-	-	2										GBE						0.0003
		n	-	-	-	-	9
	ND5	mean ±SD	-	-	-	10.3 ±5.4	46.3 ±15.4
		N	-	-	-	1	2
		n	-	-	-	7	11
	GBE	mean ±SD	4 ±3.1	15.3 ±3.9	21.7 ±7.0	42 ±13.7	48.0 ±11.6
		N	3	3	3	2	3
		n	15	13	16	16	21
	IMR90	mean ±SD	-	-	-	30.8 ±6.3	34.1 ±12.8
		N	-	-	-	3	3
		n	-	-	-	12	26
			PHH3+ cells / mm2								1-ANOVA statistical analysis (Tukey post hoc test)
			D30	D60	D90	D120	D200				5A	D30	D60	D90	D120		GBE			D30		D60	D90	D120
	5A	mean ±SD	348.4 ±214.4	145.7 ±68.7	97.4 ±63.9	51.5 ±27.9	7.0 ±8.4				D60	<0.0001					D60			<0.0001
		N	3	3	3	1	3				D90	<0.0001	0.1928				D90			<0.0001		0.0077
		n	11	29	30	11	24				D120	<0.0001	0.0185	0.5412			D120			<0.0001		0.0091	>0.9999
											D200	<0.0001	<0.0001	0.0016	0.603		D200			<0.0001		<0.0001	0.1628	0.2506
	CRTD1	mean ±SD	-	-	-	67.7 ±40.3	13.9 ±17.2
		N	-	-	-	6	3				2-ANOVA statistical analysis (Tukey post hoc test)
		n	-	-	-	45	27				D120	5A	ND5	GBE	IMR90		D200	CRTD1	CRTD2	CRTD3	ND5	GBE	IMR90		D120 vs D200	CRTD1	5A	ND5	GBE	IMR90
											CRTD1	0.8016	0.3514	0.9853	<0.0001		5A	0.431	>0.9999	0.777	0.842	>0.9999	>0.9999		CRTD1	<0.0001
	CRTD2	mean ±SD	-	-	-	-	8.293 ±12.94				5A		0.9983	0.4092	<0.0001		CRTD1		0.607	>0.9999	0.064	0.536	0.175		5A		0.0013
		N	-	-	-	-	3				ND5			0.1301	<0.0001		CRTD2			0.899	0.629	>0.9999	0.972		ND5			0.1362
		n	-	-	-	-	32				GBE				0.0121		CRTD3				0.212	0.838	0.523		GBE				<0.0001
																	ND5					0.807	0.961		IMR90					<0.0001
	CRTD3	mean ±SD	-	-	-	-	13.13 ±18.94										GBE						0.998
		N	-	-	-	-	2
		n	-	-	-	-	13
	ND5	mean ±SD	-	-	-	40.1 ±20.7	1.0 ±3.3
		N	-	-	-	1	2
		n	-	-	-	7	11
	GBE	mean ±SD	518.9 ±161.8	199.8 ±189.5	80.0 ±54.8	76.4 ±32.2	7.4 ±10.0
		N	3	3	3	2	3
		n	15	16	22	18	22
	IMR90	mean ±SD	-	-	-	109.7 ±50.5	5.3 ±8.4
		N	-	-	-	1	3
		n	-	-	-	22	25
			DAPI+ cells / ROI								2-ANOVA statistical analysis (Tukey post hoc test)
			5A	CRTD1	CRTD2	CRTD3	ND5	GBE	IMR90		D120	5A	ND5	GBE	IMR90		D200	CRTD1	CRTD2	CRTD3	ND5	GBE	IMR90		D120 vs D200	CRTD1	5A	ND5	GBE	IMR90
	D120	mean±SD	271.2 ±32.0	231.9 ±54.1	-	-	269.6 ±48.9	193.5 ±33.0	212.6 ±23.2		CRTD1	0.2556	0.5557	0.1798	0.9569		5A	>0.9999	0.83	0.985	>0.9999	0.984	0.453		CRTD1	0.0141
		N	1	4	-	-	1	2	3		5A		>0.9999	0.0003	0.0357		CRTD1		0.87	0.991	>0.9999	0.992	0.509		5A		<0.0001
		n	11	23	-	-	7	15	12		ND5			0.0048	0.1347		CRTD2			>0.9999	0.82	0.997	>0.9999		ND5			0.0015
											GBE				0.9769		CRTD3				0.969	>0.9999	0.996		GBE				>0.9999
	200	mean±SD	187.0 ±24.4	188.4 ±39.3	205.1 ±28.76	199.8 ±39.94	182.8 ±37.4	196.8 ±40.8	209.7 ±60.3								ND5					0.97	0.546		IMR90					>0.9999
		N	3	3	3	2	2	3	3								GBE						0.938
		n	25	27	15	9	11	21	25

## Sheet: Fig 5
	Related to Fig.5C: reduced data and 1-ANOVA statistical analysis (Tukey post hoc test)
		CONES									RODS									MÜLLER GLIA
		CRTD1	CRTD3	5A	ND5	GBE	IMR90	CRTD2			CRTD1	CRTD3	5A	ND5	GBE	IMR90	CRTD2			CRTD1	CRTD3	5A	ND5	GBE	IMR90	CRTD2
	mean	18.8	17.9	21.7	19.5	18.3	16.8	16.0909		mean ±SD	30.3	19.3	20.9	19	21.3	20.6	18.3635		mean ±SD	23.8	33.3	26.1	32.5	30.5	25.9	27.4751
	SD	6.5	5.8	4.5	8.1	5	7.3	6.96563			9.8	11.7	7.3	7.5	8.4	9.4	7.67633			3.1	6	5.2	8.1	6.6	8.5	6.81932
	N	4	2	7	4	4	4	3		N	4	2	4	4	4	3	3		N	4	2	3	4	3	4	3
	n	30	42	50	22	25	47	50		n	22	42	24	18	13	20	50		n	29	20	19	25	16	38	50
	CRTD3	0.9974								CRTD3	0.0002								CRTD3	0.0001
	5A	0.4327	0.0718							5A	0.0117	0.9927							5A	0.9278	0.0259
	ND5	0.9996	0.9607	0.8381						ND5	0.0028	>0,9999	0.9942						ND5	0.0002	0.9997	0.0479
	GBE	>0,9999	>0,9999	0.3195	0.995					GBE	0.0823	0.9925	>0,9999	0.9928					GBE	0.0391	0.9002	0.5102	0.9755
	IMR90	0.8475	0.9857	0.004	0.6602	0.966				IMR90	0.0131	0.9985	>0,9999	0.9984	>0,9999				IMR90	0.8858	0.0036	>0,9999	0.0065	0.3028
	CRTD2	0.4763	0.7783	0.0002	0.3108	0.7491	0.9952			CRTD2	<0,0001	0.993	0.8489	0.9996	0.9012	0.9326			CRTD2	0.5765	0.0069	>0,9999	0.0127	0.462	0.9989
		COMBINED CONES + RODS
		CRTD1	CRTD3	5A	ND5	GBE	IMR90	CRTD2
	sum	49.1	37.2	42.6	38.5	39.6	37.4	34.4544

## Sheet: Fig 8
	Related to Fig. 8C4: reduced data
				diameter [µm]
		PR cells / 1000µm2	POS/PIS [%]	PIS	POS
	mean	13.9	35.3	6.2	1.9
	SD	2	3.4	1.3	0.7
	N (HRO number)	2	2	2	2
	n (ROI number / HRO)	2	2	1	1
	number evaluated or measured per ROI	-	544-703 PIS	50 PIS	50 POS

## Sheet: Suppl Fig 3
	Related to Suppl. Fig. 3D reduced data and 1-ANOVA statistical analysis (Tukey post hoc test)
		TOTAL YIELD (T3D): 3D tissues / hiPSC well [%]									HROs / 3D tissues [%]									%RE: RAX / DAPI [IHC area] [%]
		CRTD1	CRTD2	CRTD3	5A	ND5	GBE	IMR90			CRTD1	CRTD2	CRTD3	5A	ND5	GBE	IMR90			CRTD1	CRTD2	CRTD3	5A	ND5	GBE	IMR90
	mean ±SD	11.3 ±6.4	8.8 ±1.8	3.1 ±1.3	15.4 ±11.6	2.2 ±2.0	5.0 ±4.4	4.9 ±2.5		mean ±SD	74.5 ±31	73.8 ±8.6	100 ±0	100 ±0	82.7 ±13.7	97.5 ±5.6	96.5 ±7.5		mean ±SD	58.5 ±20.0	62.9 ±17.6	54.0 ±18.3	61.5 ±14.5	42.8 ±19.9	57.3 ±13.6	66.1 ±14.8
	N	8	4	4	6	4	4	4		N	7	3	2	7	4	5	7		N	4	2	2	4	4	4	4
																			n	23	35	30	21	22	16	21
	CRTD2	0.9939								CRTD2	>0.9999								CRTD2	0.9669
	CRTD3	0.3685	0.8597							CRTD3	0.4225	0.5427							CRTD3	0.9662	0.3832
	5A	0.8926	0.6729	0.0729						5A	0.0674	0.2296	>0.9999						5A	0.9977	>0.9999	0.7389
	ND5	0.2573	0.7606	>0.9999	0.0453					ND5	0.9788	0.9884	0.86	0.5881					ND5	0.0448	0.0007	0.2559	0.0101
	GBE	0.6589	0.9767	0.9995	0.1816	0.9957				GBE	0.1974	0.3996	>0.9999	>0.9999	0.7966				GBE	>0.9999	0.9347	0.9966	0.9906	0.1569
	IMR90	0.6509	0.9751	0.9996	0.1775	0.9961	>0.9999			IMR90	0.1581	0.3839	>0.9999	0.9995	0.7982	>0.9999			IMR90	0.7739	0.9939	0.1847	0.9767	0.0004	0.7227

## Sheet: Suppl Fig 5
	Related to Supplementary Figure 5A-D: reduced data and 2-way ANOVA statistical analysis (Sidak post-hoc test)
					5A	CRTD1	CRTD2	CRTD3
	A	3D tissues / hiPSC well	CYST	mean ±SD	24.2 ±5.9	15.5 ±2.3	8.8 ±0.9	3.1 ±0.7
				N	2	4	4	4
			AGG	mean ±SD	15 ±1.7	0.6 ±0.2	0.5 ±0.5	3.5 ±1.8
				N	2	4	4	4
			p value		0.04	0.001	0.009	>0.99
	B	HRO / 3D tissues [%]	CYST	mean ±SD	100 ±0	83 ±4.3	78.1 ±11.1	58.8 ±47.7
				N	2	4	4	4
			AGG	mean ±SD	42.5 ±40.3	0	25 ±50.0	55.5 ±44.7
				N	2	4	4	4
			p value		0.27	0.010	0.11	>0.99
	C	# HROs / hiPSC well	CYST	mean ±SD	24.2 ±8.3	11.4 ±7.3	5.5 ±3.4	1.2 ±1.2
				N	2	4	4	4
			AGG	mean ±SD	2.2 ±2.6	0	0.5 ±1.0	2.0 ±2.1
				N	2	4	4	4
			p value		0.001	0.01	0.38	1579
	D	RAX / DAPI [%] [IHC area]	CYST	mean ±SD	61.8 ±16.4	47.6 ±11.7	51.3 ±10.2	35.2 ±8.1
				N	2	4	4	4
				n	11	6	9	3
			AGG	mean ±SD	53.8 ±19.0	0	49.8 ±13.3	49.6 ±18.1
				N	2	4	4	4
				n	13	0	4	14
