# Supplementary material for: Reliability of human retina organoid generation from hiPSC-derived neuroepithelial cysts
Source: Front Cell Neurosci. 2023 Oct 6;17:1166641. doi: 10.3389/fncel.2023.1166641 (PMC10587494; doi:10.3389/fncel.2023.1166641)
Supplement: Supplementary file 4 [file Table_4.XLSX]

## Sheet: 1) Cowan data used for CaSTLe
Cell type annotation used for transfer learning approach (from Cowan et al. 2020)
Compressed cell types		Original cell types
Cell type	Count	Cell type	Count
AC B (Amacrine cell, GABAergic)	1230	AC B 01	141
		AC B 02	29
		AC B 04	88
		AC B 05	59
		AC B 06	167
		AC B 07	17
		AC B 08	32
		AC B 09	13
		AC B 10	142
		AC B 11	11
		AC B 12	253
		AC B 13	33
		AC B 15	51
		AC B 16	20
		AC B 17	107
		AC B 18	67
AC Y (Amacrine cell, glycinergic)	81	AC Y 01	58
		AC Y 03	23
Ast (Astrocyte)	55	Ast	55
CdBC (Cone ON bipolar cell (depolarizing))	1700	CdBC 01	283
		CdBC 02	1235
		CdBC 03	123
		CdBC 04	28
		CdBC 05	31
ChBC (Cone OFF bipolar cell (hyperpolarizing))	658	ChBC 01	235
		ChBC 02	66
		ChBC 03	204
		ChBC 04	153
HC 02 (horizontal cell)	1762	HC 02	1762
cones	12973	L/M cone	12892
		S cone	81
MC (Müller glia cell)	10542	MC 01	10341
		MC 02	112
		MC 03	89
RBC (Rod bipolar cells)	461	RBC	461
rod	13913	rod	13913
RPE (Retinal pigment epithelium)	130	RPE	130

## Sheet: 2) HRO1 - cell composition
	Organoid cell type composition HRO1 [%]
	CaSTLe	HRO1	Manual
cones	43	Cones	28
MC	21	Rods	25
rod	11	Müller Glia	25
ChBC	9	Bipolar	12
CdBC	7	Premature PR	6
HC_02	6	AHG	4
AC_B	1
RBC	1
AC_Y	0
RPE	0
Ast	0

## Sheet: 3) HRO2 - cell composition
	Organoid cell type composition HRO2 [%]
	CaSTLe	HRO2	Manual
cones	37	Cones	23
MC	16	Rods	22
rod	16	Müller Glia	21
ChBC	11	Premature PR	16
CdBC	10	Bipolar	15
HC_02	6	AHG	4
RBC	2
AC_B	1
AC_Y	0
RPE	0

## Sheet: 4) Integrated cell compositi
	Organoid cell type composition integrated: HRO1+HRO2
	CaSTLe	Integrated	Manual
cones	40	Cones	26
MC	19	Rods	24
rod	13	Müller Glia	23
ChBC	10	Bipolar	13
CdBC	9	Premature PR	10
HC_02	6	AHG	4
RBC	2
AC_B	1
AC_Y	0
RPE	0
Ast	0
